# Supplementary material for: Photosynthetic usable energy explains vertical patterns of biodiversity in zooxanthellate corals
Source: Research Square preprint supplement (doi:10.21203/rs.3.rs-1746204/v1), 2022-06-16
Supplement: Supplementary file 1 [file 0c4491e5bd80b1164f7f4584.xlsx]

## Sheet: Metadata
Supplementary Table 1
Parameters used to test the ability of the productivity-biodiversity model to explain the variation in coral species richness along depth gradients in marine biodiversity hotspots distributed around the world
Parameters	Description	Units
Depth	Depth intervals of empirical observation of coral species richness	m
Int. Irrad	Estimated daily integrated irradiance	mol quanta m-2 d-1
Int. Prod	Estimated daily integrated productivity	mol O2 m-2 d-1
Int. Prod. Rel	Daily integrated productivity relative to the estimated maximum	%
PSII HT	PSII half-time under available irradiance at depth z	h
Cz	Energy expenditure in photorepair by the zooxanthellae relative to gross productivity	%
PUES	Photosynthetic usable energy supply by the zooxanthellae relative to gross productivity	%
Empiric S	Empirical observations of coral species richness	# species
Predicted S	Coral species richness predicted by the productivity-biodiversity model	# species
Residuals	Model residuals	# species
Authors	Authors of the study that reported the change in number of coral species with depth
Location	Location of the study (indicating the biodiversity hotspot to which it belongs)

## Sheet: Table S1
Parameter>	Depth	Int. Irrad	Int. Prod	Int. Prod. Rel	PSII HT	Cz	PUES	Empiric S	Predicted S	Residuals	Authors	Location
Units>	m	mol quanta m-2 d-1	mol O2 m-2 d-1	Relative (%)	h	Relative (%)	Relative (%)	# species	# species	# species
1	2.5	40.0973	0.43848	100	2.04871	87.8603	12.1397	146.23	149.362	-3.13212	Roberts et al. (2019)	Papua New Guinea (Indo-Pacific)
2	7.5	26.6106	0.421485	96.124	2.56453	70.1886	25.9354	169.71	165.278	4.43154
3	12.5	17.6601	0.389679	88.8704	3.21021	56.0713	32.7991	173.62	173.197	0.422735
4	17.5	11.7202	0.337853	77.051	4.01846	44.7935	32.2575	169.5	172.572	-3.07244
5	22.5	7.77808	0.269553	61.4744	5.0302	35.784	25.6904	164.4	164.996	-0.595878
6	27.5	5.16193	0.199213	45.4327	6.29668	28.5866	16.8461	154	154.792	-0.791991
7	32.5	3.42571	0.139732	31.8673	7.88202	22.8369	9.03047	148	145.775	2.22499
8	37.5	2.27348	0.095207	21.7129	9.86652	18.2436	3.46935	144.24	139.359	4.88094
9	42.5	1.50879	0.0639481	14.584	12.3507	14.5742	0.00985737	131	135.368	-4.36778
10	5	36.4634	0.347267	100	1.88794	95.4163	4.58369	6.5	6.83314	-0.333141	Huston (1985)	Jamaica (Caribbean)
11	10	27.0128	0.332494	95.7461	2.26027	79.6984	16.0477	12	10.9047	1.09527
12	15	20.0116	0.310052	89.2835	2.70604	66.5697	22.7138	12	13.2723	-1.27228
13	20	14.8249	0.278564	80.216	3.23971	55.6037	24.6123	14.5	13.9466	0.553417
14	30	8.13609	0.196688	56.6389	4.64357	38.7934	17.8455	11.5	11.5433	-0.043267
15	3	42.7475	0.197996	100	1.87709	99.7289	0.271102	14.6	15.6272	-1.02721	Loya (1972)	Gulf of Eilat (Indian Ocean)
16	5	38.9123	0.19799	99.9969	1.97297	94.8821	5.11479	19.58	16.8408	2.73919
17	10	30.7629	0.197934	99.9686	2.23467	83.7709	16.1977	22	19.6177	2.38233
18	15	24.3203	0.197712	99.8569	2.53107	73.9608	25.8961	15.22	22.0476	-6.82762
19	20	19.2269	0.197082	99.5387	2.86679	65.2996	34.2391	24.33	24.138	0.192014
20	25	15.2002	0.195693	98.837	3.24703	57.6526	41.1844	26	25.8782	0.121848
21	30	12.0169	0.193171	97.5631	3.67772	50.9011	46.6619	29.67	27.2506	2.41944
22	1	36.3542	0.384072	100	11.0037	16.3582	83.6418	19.4	13.9808	5.41918	Chow et al. (2019)	Pulau Hantu (Indo-Pacific)
23	2	26.8512	0.379858	98.9028	12.0508	14.9368	83.966	12.2	14.0492	-1.84918
24	3	19.8323	0.371491	96.7241	13.1975	13.6389	83.0852	11.8	13.8635	-2.06346
25	4	14.6481	0.357418	93.0602	14.4534	12.4538	80.6064	11.8	13.3408	-1.54079
26	5	10.8191	0.335601	87.3798	15.8288	11.3717	76.0081	11.2	12.3712	-1.17124
27	6	7.99095	0.304174	79.197	17.335	10.3836	68.8134	10	10.8542	-0.85424
28	7	5.90211	0.263701	68.6593	18.9846	9.48137	59.178	9.6	8.8226	0.777402
29	8	4.35929	0.218319	56.8431	20.7912	8.65752	48.1856	10.2	6.50485	3.69515
30	9	3.21977	0.173741	45.2367	22.7696	7.90526	37.3314	3	4.21623	-1.21623
31	10	2.37812	0.134315	34.9712	24.9364	7.21836	27.7529	1	2.19659	-1.19659
32	1	37.2373	0.25522	100	5.49636	32.749	67.251	19.75	20.3001	-0.550068	Chow et al. (2019)	Raffles Lighthouse (Indo-Pacific)
33	2	28.1715	0.2547	99.7962	6.08438	29.584	70.2122	24.6	22.6564	1.94359
34	3	21.3128	0.253157	99.1917	6.73532	26.7248	72.4669	21.8	24.4505	-2.65049
35	4	16.124	0.249794	97.8739	7.45589	24.142	73.7319	27.6	25.4571	2.1429
36	5	12.1985	0.243839	95.5407	8.25356	21.8088	73.7319	24.6	25.4571	-0.857082
37	6	9.22862	0.234447	91.8606	9.13656	19.7011	72.1595	22.6	24.2059	-1.60588
38	7	6.98182	0.220509	86.3996	10.114	17.7971	68.6026	24.2	21.3755	2.82446
39	8	5.28203	0.20112	78.8026	11.1961	16.0771	62.7255	15.4	16.6991	-1.29905
40	9	3.99606	0.176633	69.2082	12.3939	14.5233	54.6849	10.2	10.301	-0.100956
41	10	3.02318	0.149145	58.4376	13.7198	13.1197	45.3179	3	2.84742	0.152577
42	1.06	46.1875	0.401824	100	2.15819	84.6066	15.3934	4.6	12.2831	-7.68308	Sheppard (1980)	Chagos Seaward (Indian-Ocean)
43	2.2	43.1339	0.40081	99.7478	2.2343	81.7244	18.0235	7.79	14.4654	-6.67543
44	3.17	40.6952	0.399795	99.4952	2.30118	79.3494	20.1459	19.83	16.2265	3.60349
45	5.81	34.7337	0.39623	98.608	2.4935	73.2292	25.3788	24.62	20.5686	4.05141
46	8.99	28.7004	0.390133	97.0905	2.74663	66.4806	30.6099	30.12	24.9091	5.21087
47	11.98	23.9869	0.382258	95.1309	3.00802	60.7035	34.4274	33.31	28.0767	5.23331
48	18.85	15.884	0.35387	88.066	3.70675	49.2607	38.8053	34.57	31.7093	2.86069
49	24.05	11.6268	0.32032	79.7167	4.34166	42.057	37.6597	28.92	30.7587	-1.8387
50	29.78	8.2442	0.271794	67.6402	5.16792	35.3328	32.3074	20.44	26.3176	-5.87765
51	36.04	5.66275	0.212495	52.8827	6.25136	29.2092	23.6735	14.8	19.1536	-4.35358
52	41.67	4.03946	0.162359	40.4055	7.41848	24.6138	15.7916	10.57	12.6135	-2.04355
53	44.85	3.33779	0.137507	34.2207	8.17155	22.3455	11.8752	8.8	9.36387	-0.563867
54	47.84	2.78963	0.116852	29.0805	8.94922	20.4037	8.67679	8.28	6.70997	1.57003
55	60.88	1.27572	0.0551694	13.7298	13.3036	13.7254	0.00435555	6.02	-0.486037	6.50604
56	1.45	45.1193	0.431794	100	1.8029	99.844	0.155956	5.19	10.457	-5.26701	Sheppard (1980)	Chagos Lagoon (Indian Ocean)
57	3.69	39.4451	0.428765	99.2985	1.94729	92.4407	6.85779	18.09	14.8813	3.20874
58	6.48	33.3651	0.423584	98.0986	2.1434	83.9826	14.1159	21.12	19.6728	1.44723
59	9.53	27.7854	0.415818	96.3	2.38046	75.6191	20.6808	24.4	24.0066	0.393375
60	12.12	23.7863	0.407182	94.2999	2.60224	69.1743	25.1256	26.92	26.9408	-0.0208386
61	17.45	17.2759	0.382015	88.4715	3.12581	57.5879	30.8836	32.48	30.742	1.73798
62	24.46	11.3442	0.330583	76.5603	3.97805	45.2505	31.3098	26.88	31.0234	-4.14338
63	30.25	8.01496	0.274699	63.618	4.85462	37.0799	26.5381	26.99	27.8733	-0.883344
64	40.37	4.36715	0.174586	40.4327	6.87569	26.1804	14.2523	23.29	19.7628	3.52723
